# Supplementary material for: Genome-Scale Metabolic Modelling Approach to Understand the Metabolism of the Opportunistic Human Pathogen Staphylococcus epidermidis RP62A
Source: MDPI journal article supplement (doi:10.3390/metabo12020136), 2022-02-02
Supplement: s1 [file s1]

Table 1: Distribution of biomass precursors as described in the model. All values are mmol.GDW<sup>-1</sup>. \* Glycogen as abundance of glucose residues.

| AA residues               |       |     |       | DNA                   |           | Biofilm               |       |
|---------------------------|-------|-----|-------|-----------------------|-----------|-----------------------|-------|
| Ala                       | 0.212 | Leu | 0.282 | DATP                  | 0.02      | PIA1                  | 3.345 |
| Arg                       | 0.111 | Lys | 0.235 | DCTP                  | 0.099     | PIA2                  | 1.110 |
| Asn                       | 0.173 | Met | 0.084 | DGTP                  | 0.099     | PIA3                  | 0.187 |
| Asp                       | 0.261 | Phe | 0.137 | DTTP                  | 0.02      |                       |       |
| Cys                       | 0.019 | Pro | 0.116 | RNA                   |           |                       |       |
| Gln                       | 0.2   | Ser | 0.198 | ATP                   | 0.061     |                       |       |
| Glt                       | 0.199 | Thr | 0.179 | CTP                   | 0.059     |                       |       |
| Gly                       | 0.19  | Tyr | 0.119 | GTP                   | 0.059     |                       |       |
| His                       | 0.073 | Val | 0.207 | UTP                   | 0.061     |                       |       |
| Ile                       | 0.269 |     |       |                       |           |                       |       |
| Cell wall/membrane        |       |     |       | Soluble metabolites   |           |                       |       |
| Diacylglycerol            |       |     |       | 0.019                 | Glycogen* |                       | 0.053 |
| phosphatidylglycerol      |       |     |       | 0.045                 | AcCoA     | $36.5 \times 10^{-6}$ |       |
| Cardiolipin               |       |     |       | $5.59 \times 10^{-3}$ | SucCoA    | $2.21 \times 10^{-6}$ |       |
| Lipoteichoic acid         |       |     |       | $3.35 \times 10^{-3}$ | CoA       | $44.2 \times 10^{-6}$ |       |
| diglucosyl-diacylglycerol |       |     |       | $6.69 \times 10^{-3}$ | FAD       | $74.1 \times 10^{-6}$ |       |
| "3-DG-diacylglycerol"     |       |     |       | $1.12 \times 10^{-3}$ | NAD       | $1.58 \times 10^{-3}$ |       |
| Menaquinone               |       |     |       | $7.44 \times 10^{-3}$ | NADH      | $36.5 \times 10^{-6}$ |       |
| peptidoglycan             |       |     |       | 0.01                  | NADP      | $96.2 \times 10^{-6}$ |       |
| Teichoic acid             |       |     |       | 0.062                 | NADPH     | $29.5 \times 10^{-6}$ |       |
