# Supplementary material for: Genome-Scale Metabolic Modelling Approach to Understand the Metabolism of the Opportunistic Human Pathogen Staphylococcus epidermidis RP62A
Source: MDPI journal article supplement (doi:10.3390/metabo12020136), 2022-02-02
Supplement: s1 [file s1]

## Composition of the Modified HHW Media

| Component                                                                                                             | Concentration (mM) |
|-----------------------------------------------------------------------------------------------------------------------|--------------------|
| Ammonium iron(II) sulfate hexahydrate( $(\text{NH}_4^+)_2\text{SO}_4 \cdot \text{FeSO}_4 \cdot 6\text{H}_2\text{O}$ ) | 0.21               |
| Calcium chloride anhydrous ( $\text{CaCl}_2$ )                                                                        | 0.45               |
| Disodium hydrogen phosphate anhydrous ( $\text{Na}_2\text{HPO}_4$ )                                                   | 56.1               |
| Magnesium sulfate anhydrous ( $\text{MgSO}_4$ )                                                                       | 2.03               |
| Manganese sulfate monohydrate ( $\text{MnSO}_4 \cdot \text{H}_2\text{O}$ )                                            | 0.29               |
| Potassium dihydrogen phosphate ( $\text{KH}_2\text{PO}_4$ )                                                           | 22.0               |
| Glucose                                                                                                               | 11.1               |
| L-Ala                                                                                                                 | 1.12               |
| L-Arg                                                                                                                 | 0.57               |
| L-Asn                                                                                                                 | 1.13               |
| L-Asp                                                                                                                 | 1.13               |
| L-Cys                                                                                                                 | 0.41               |
| Gly                                                                                                                   | 1.33               |
| L-Glt                                                                                                                 | 1.02               |
| L-His                                                                                                                 | 0.64               |
| L-Ile                                                                                                                 | 1.14               |
| L-Leu                                                                                                                 | 1.14               |
| L-Lys                                                                                                                 | 0.68               |
| L-Met                                                                                                                 | 0.67               |
| L-Phe                                                                                                                 | 0.60               |
| L-Pro                                                                                                                 | 1.30               |
| L-Ser                                                                                                                 | 0.95               |
| L-Thr                                                                                                                 | 1.26               |
| L-Trp                                                                                                                 | 0.49               |
| L-Tyr                                                                                                                 | 0.55               |
| L-Val                                                                                                                 | 1.28               |
| Biotin                                                                                                                | 0.04               |
| Nicotinic acid (niacin)                                                                                               | 0.16               |
| Thiamine hydrochloride                                                                                                | 0.59               |
| Final pH adjusted to $7.2 \pm 0.2$ at 25 using 0.1M NaOH.                                                             |                    |
